# Supplementary material for: Sn-doped hematite films as photoanodes for efficient photoelectrochemical water oxidation
Source: Royal Society of Chemistry journal article supplement (doi:10.1039/c4ta06872f), 2015-01-01
Supplement: c4ta06872f1.pdf [file c4ta06872f1.pdf]

## Supporting Information

### Sn-doped Hematite Film as Photoanode for Efficient Photoelectrochemical Water Oxidation

**Dong-Dong Qin,<sup>\* a</sup> Yun-Lei Li,<sup>a</sup> Ting Wang,<sup>a</sup> Yang Li,<sup>a</sup> Xiao-Quan Lu,<sup>a</sup> Jing Gu,<sup>b</sup> Yi-Xin Zhao,<sup>c</sup>  
Yu-Min Song<sup>\*a</sup> and Chun-Lan Tao<sup>\*d</sup>**

<sup>a</sup>Key Lab of Bioelectrochemistry and Environmental Analysis of Gansu, College of Chemistry and Chemical Engineering, Northwest Normal University, Lanzhou, Gansu 730070, People's Republic of China. E-mail: songym@nwnu.edu.cn

<sup>b</sup>Department of Chemistry, Princeton University, Princeton, New Jersey 08544, United States

<sup>c</sup>School of Environmental Science and Engineering, Shanghai Jiao Tong University, 200240, People's Republic of China

<sup>d</sup>School of Physical Science and Technology, Lanzhou University, Lanzhou, Gansu 730000, People's Republic of China, E-mail: taochl@lzu.edu.cn

\*To whom the corresponding should be addressed at: [qindd05@gmail.com](mailto:qindd05@gmail.com) (Dr. Dong-Dong Qin), [songym@nwnu.edu.cn](mailto:songym@nwnu.edu.cn) (Dr. Yu-Min Song) and [taochl@lzu.edu.cn](mailto:taochl@lzu.edu.cn) (Dr. Chun-Lan Tao)

## 1. Experimental

All chemical compounds employed in this work were purchased from Aladdin.  $\text{FeCl}_3 \cdot 6\text{H}_2\text{O}$  (99%),  $\text{NaF}$  (98%),  $\text{KCl}$  (99.5%),  $\text{H}_2\text{O}_2$  (30%),  $\text{SnCl}_2 \cdot 2\text{H}_2\text{O}$  (98%) and  $\text{NaOH}$  (96%) were used as received without further purification. DI water was used throughout the sample preparation and measurement. The FTO glass was purchased from Ao Pi Wei Te Company (Dalian, China) and used as received.

The detailed procedure for modification of samples with  $\text{Co}^{2+}$  is as follows: The samples were dipped in the 0.1 M  $\text{Co}(\text{NO}_3)_2 \cdot 6\text{H}_2\text{O}$  aqueous solution for 1 min. After that, the samples were taken out and dried at room temperature for 1 min., and then followed by washing with DI water.

The conversion efficiency is estimated using the following equation: 
$$\eta = \frac{I(1.23 - V)}{J_{\text{light}}} \times 100\%$$
,<sup>1-5</sup> where V is the bias potential vs. RHE, I is the photocurrent density at the measured potential, and  $J_{\text{light}}$  is the power density of incident light.

The morphology of the hematite films were characterized by using a field-emission scanning electron microscope (Hitachi S-4800) operated at an accelerating voltage of 5 kV. X-ray diffraction patterns (XRD) were recorded on a D/max-2400 (Rigaku) instrument using  $\text{Cu K}\alpha$  radiation ( $\lambda = 1.5406 \text{ \AA}$ ) between  $20^\circ$  to  $70^\circ$  at a scanning rate of  $0.067^\circ/\text{s}$ . Raman spectra were recorded at a JY-HR800 Micro-Raman, using a 532 nm wavelength YAG laser with a laser spot diameter of about 600 nm. The elements composition was determined by X-ray photoelectron spectroscopy (XPS, Kratos Axis Ultra DLD). Photoluminescence and Time-Correlated Single Photon Counting were tested in FLS920 (Edinburgh Instruments). UV-visible diffusion reflectance spectra were measured on a UV-2550 (Shimadzu) spectrometer by using bare FTO as reference. Photoelectrochemical measurements were tested using a three-electrode configuration with the hematite films as the working photoelectrode, saturated calomel electrode (SCE) as the reference electrode, and platinum foil as the counter electrode in 1 M NaOH. Sunlight was simulated with a 300 W xenon lamp and an AM1.5G filter (HSX-F300, Beijing NBeT Technology Co., Ltd). The light intensity was set to  $100 \text{ mW} \cdot \text{cm}^{-2}$  using a calibrated crystalline silicon solar cell. Photocurrent response and electrochemical impedance spectroscopy (EIS) were recorded using a CHI-660E potentiostat, with the data fit to an equivalent circuit model using ZView software. The superimposed alternating current (AC) signal was maintained at 5 mV, while the frequency was scanned between 100 kHz and 0.1 Hz at potentials between 0.7 and 1.3 V versus RHE in the dark and under illumination in an electrolyte of 1 M NaOH, with Pt as the counter electrode. The capacitance was extracted from the EIS spectra by use of an equivalent circuit  $\text{Rs}(\text{CPE-Rp})$ , where Rs is the ohmic contribution, CPE is the constant phase element that takes into account non-idealities in the capacitance of the Helmholtz layer, and Rp is the charge-transfer resistance. IPCE were measured using light from a 300 W xenon lamp that was focused by a parabolic reflector and passed through a monochromator, at 1.2 V bias versus RHE. Samples were measured using a hematite film as the working photoelectrode and platinum foil as the counter electrode in 1 M NaOH.

## 2. Raman spectra

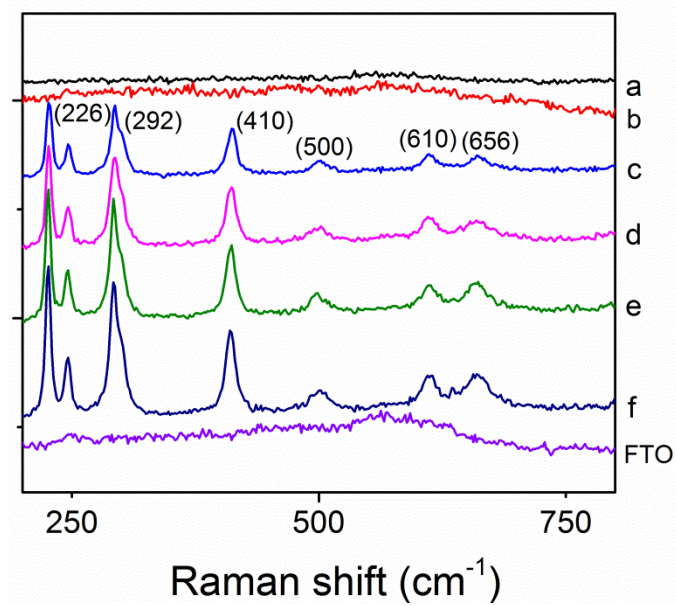

**Fig. S1** Raman spectra of the samples: a) and b) 0% and 5% Sn doped samples without thermal annealing, c), d), e) and f) 0%, 2%, 5%, 10% Sn doped samples after annealing at 750 °C for 30 min.

## 3. XPS spectra

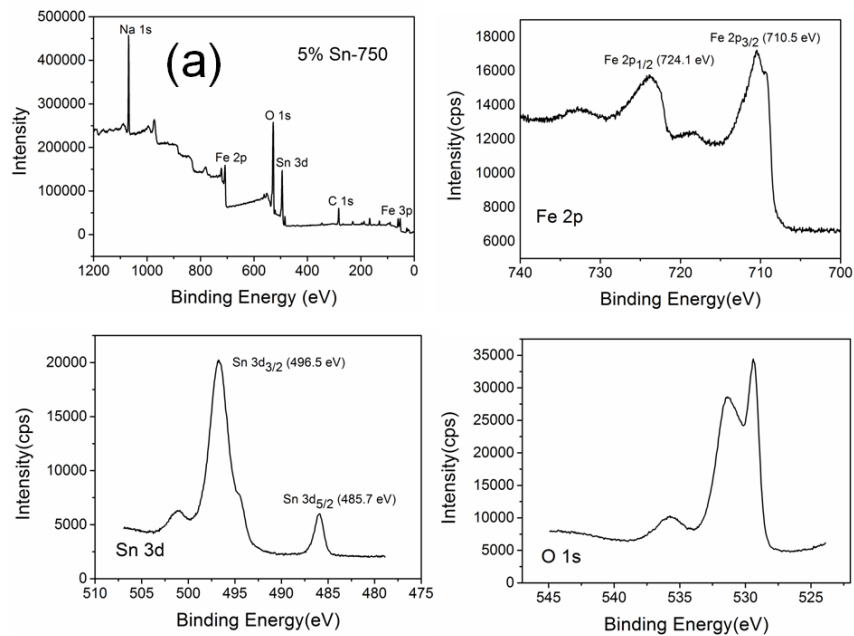

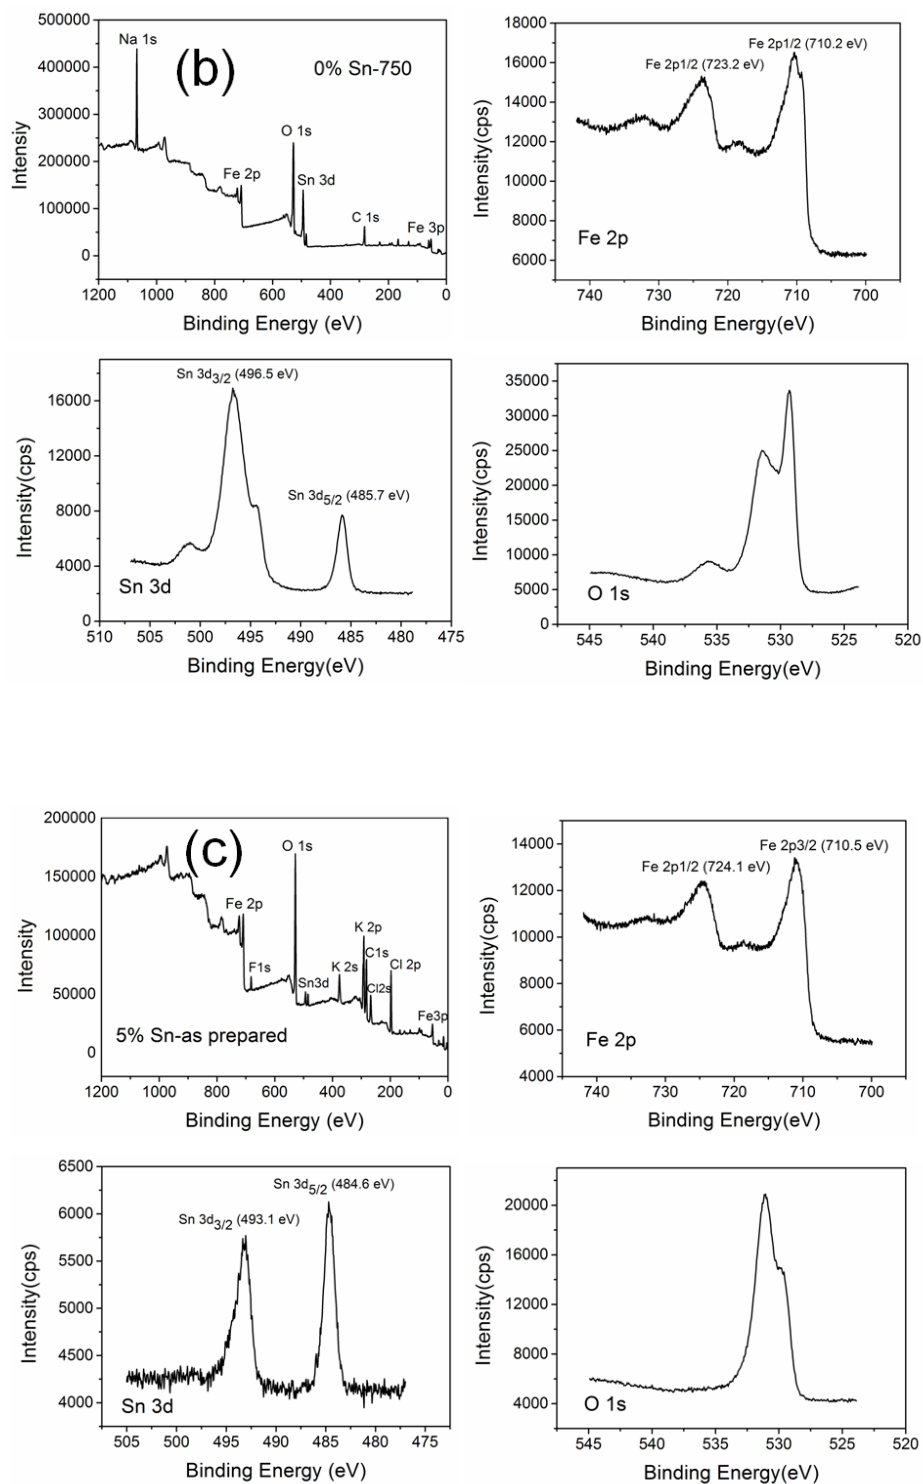

**Fig. S2** XPS data of samples, a) 5% Sn-750 °C; b) 0% -750 °C; c) 5% Sn as prepared.

#### 4. Optical spectra

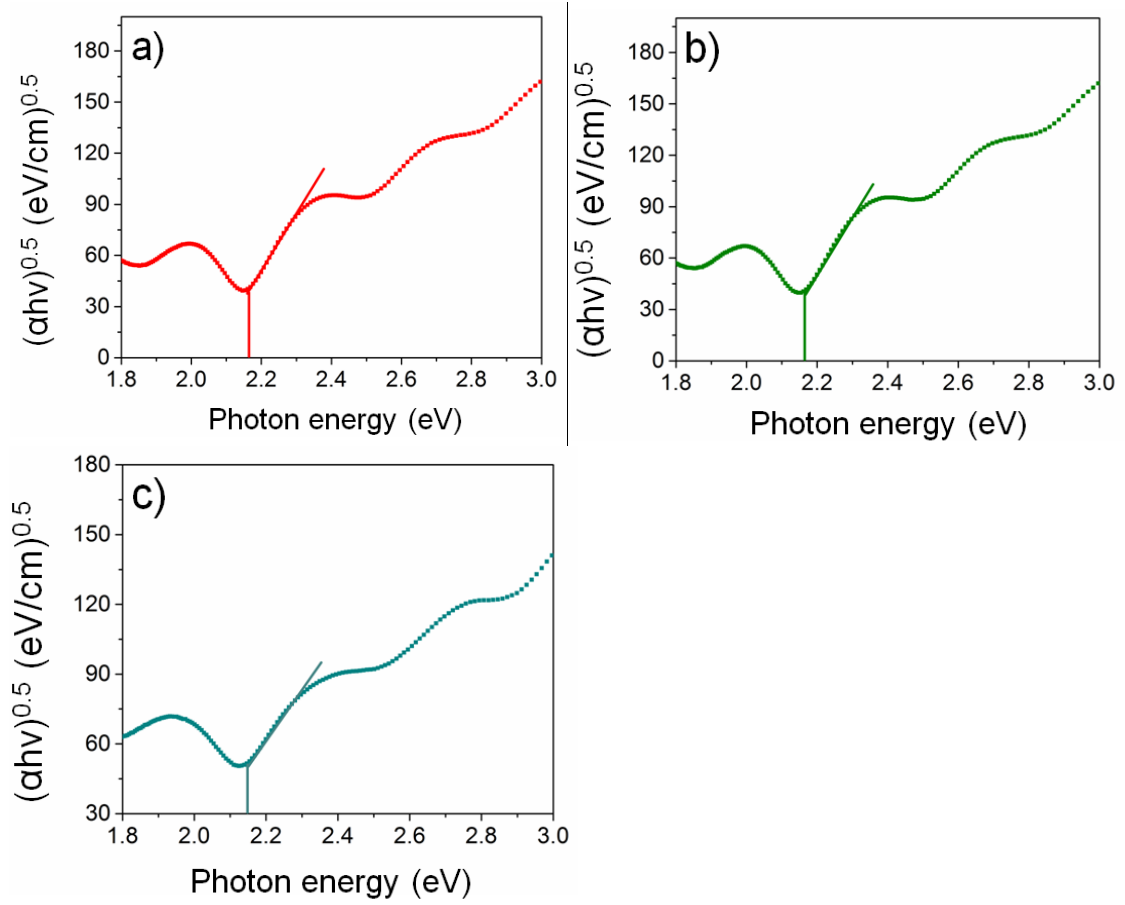

Fig. S3 Optical spectra of 5% Sn-750, 0% Sn-750 and 5% Sn-as prepared samples.

#### 5. Photoluminescence spectra

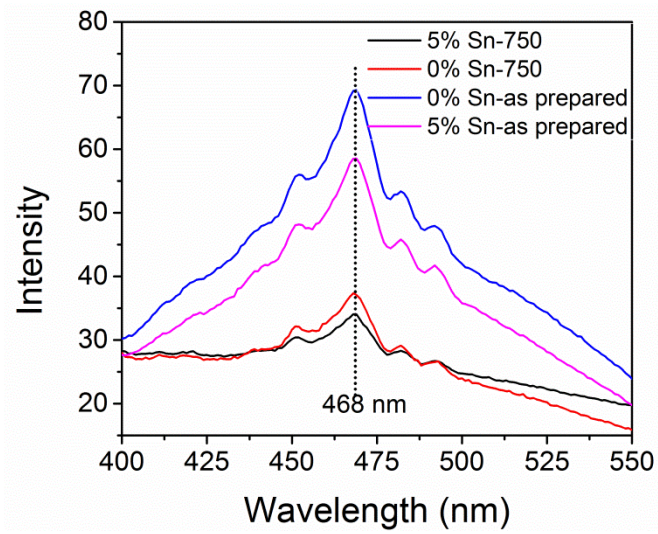

Fig. S4 Photoluminescence spectra of samples, with excitation wavelength of 360 nm.

## 6. Time-Correlated Single Photon Counting

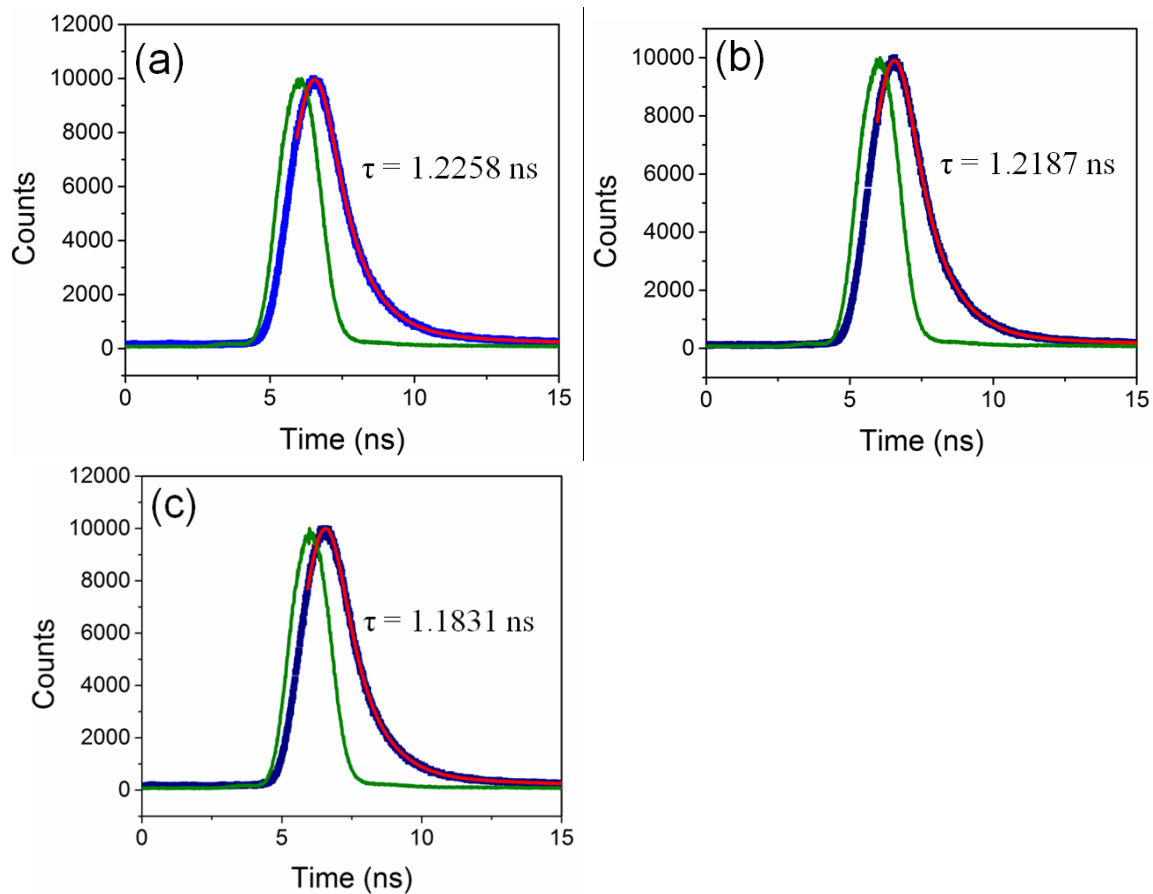

**Fig. S5** Time-Correlated Single Photon Counting results (blue line) for the samples of 5% Sn-750 (a), 0% Sn-750 (b) and 5% Sn-as prepared (c) at 298 K. Excitation: 360 nm, emission: 468 nm. The red line is the best fit results. Green line is the IRF curve.

## 7. Photocurrent response of the samples

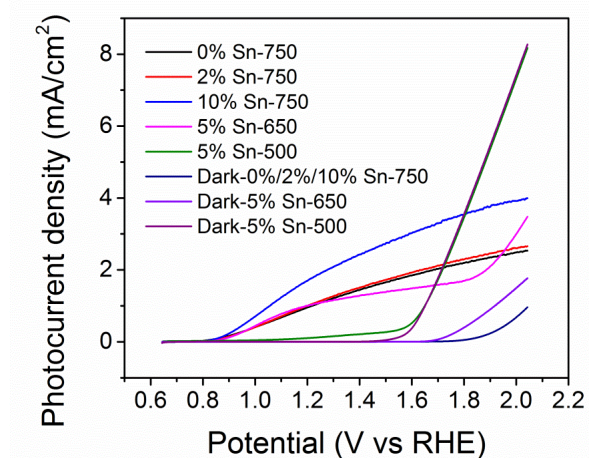

**Fig. S6** Photocurrent of the samples in 1 M NaOH, under illumination of AM 1.5G ( $100 \text{ mW} \cdot \text{cm}^{-2}$ ).

## 8. Influence of deposition time and heating rate to the photocurrent of the samples

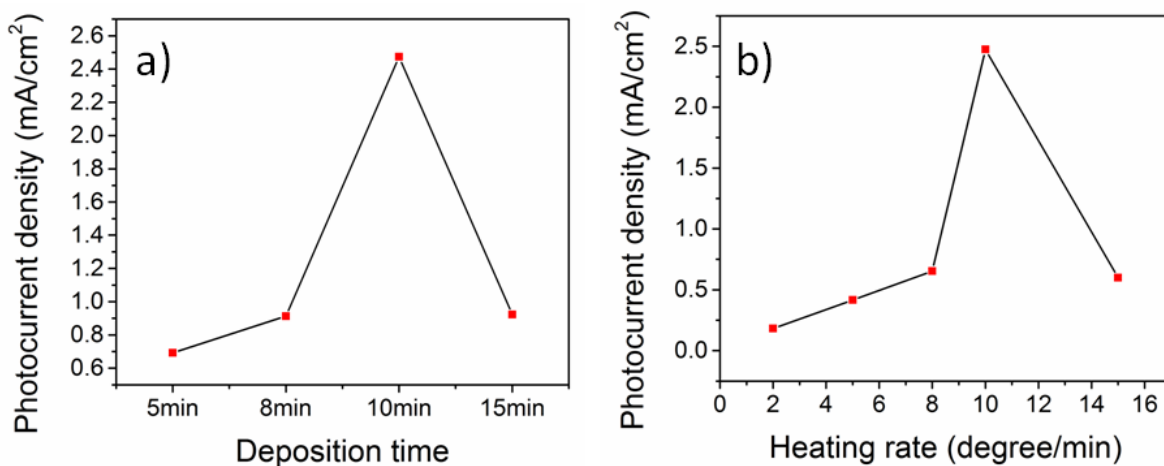

**Fig. S7** a) Photocurrent of the 5% Sn doped sample with different electrochemical deposition time after being annealed at  $750 \text{ }^{\circ}\text{C}$  for 30 min. with a heating rate of  $10 \text{ }^{\circ}\text{C}/\text{min.}$ ; b) Photocurrent of the 5% Sn doped, 10 min. electrochemical deposited sample after being annealed at  $750 \text{ }^{\circ}\text{C}$  for 30 min. with different heating rate. The photocurrent was recorded at bias of  $1.24 \text{ V}$  vs RHE in 1.0 M NaOH, under illumination of AM 1.5 G,  $100 \text{ mW} \cdot \text{cm}^{-2}$ .

## 9. Photocurrent response under chopped light.

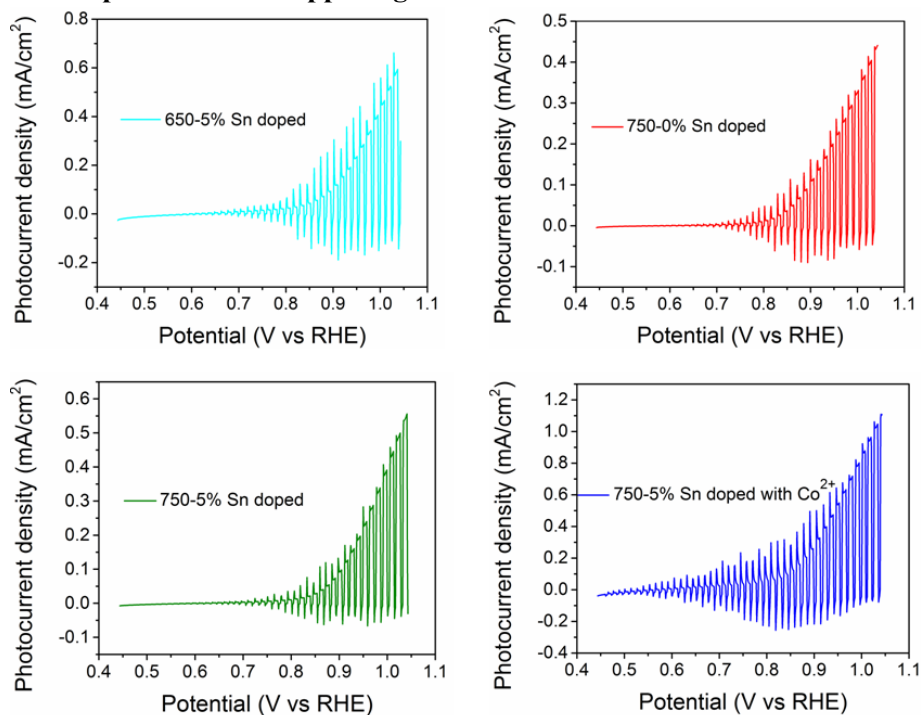

**Fig. S8** Photocurrent response of the samples under chopped light in 1 M NaOH, with illumination of AM 1.5G, 100 mW·cm<sup>-2</sup>.

## References:

1. Yang Hou, Fan Zuo, Alex Dagg, and Pingyun Feng, *Angew. Chem. Int. Ed.* **2013**, 52, 1248-1253.
2. Damon A. Wheeler, Gongming Wang, Yichuan Ling, Yat Li and Jin Z. Zhang, *Energy Environ. Sci.*, **2012**, 5, 6682–6702.
3. Yang Hou, Fan Zuo, Alex Dagg, and Pingyun Feng, *Nano Lett.* **2012**, 12, 6464–6473.
4. Gurudayal, Sing Yang Chiam, Mulmudi Hemant Kumar, Prince Saurabh Bassi, Hwee Leng Seng, James Barber, and Lydia Helena Wong, *ACS Appl. Mater. Interfaces* **2014**, 6, 5852–5859.
5. Z. Chen, T. F. Jaramillo et al, *J. Mater. Res.*, **2010**, 25, 3–16
